# Supplementary material for: Banbury Forum Consensus Statement on the Path Forward for Digital Mental Health Treatment
Source: Atypon-hosted journal article supplement (doi:10.1176/appi.ps.202000561), 2021-01-20
Supplement: appi.ps.202000561.ds001.pdf [file appi.ps.202000561.ds001.pdf]

### **The Banbury Forum on Digital Mental Health**

The Banbury Forum on Digital Mental Health was cochaired by Patricia A. Areán, Ph.D. (University of Washington), and David C. Mohr, Ph.D. (Northwestern University), and included Francisca Azocar, Ph.D. (Optum), Andrew Bertagnolli, Ph.D. (One Medical and Alliant International University), Tanzeem Choudhury, Ph.D. (Cornell Tech), Paul Chrisp, Ph.D. (National Institute for Health and Care Excellence), Mark Cunningham-Hill (Northeast Business Group on Health), Mary Czerwinski, Ph.D. (Microsoft Research), Lu Dong, Ph.D. (RAND Corporation), Munmun De Choudhury, Ph.D. (Georgia Institute of Technology), Richard Frank, Ph.D. (Harvard Medical School), Henry Harbin, M.D. (health care consultant and former chief executive officer of Magellan Health Services), Charlie Hartwell (Bridge Builders Collaborative), Trina Histon, Ph.D. (Kaiser Permanente), Tom Insel, M.D. (Mindstrong), Debra Kaysen, Ph.D. (Stanford University), Neil Leibowitz, M.D. (Talkspace), Camille Nebeker, Ph.D. (University of California, San Diego), Theresa Nguyen (Mental Health America), Derek Richards, Ph.D. (Trinity College, University of Dublin, and SilverCloud Health), Phil Ritter, J.D. (Meadows Mental Health Policy Institute), Stephen M. Schueller, Ph.D. (University of California, Irvine), Nickolai Titov, Ph.D. (MindSpot Clinic, Macquarie University), and John Torous, M.D. (Harvard Medical School).
